# Supplementary material for: Transcutaneous electrical diaphragmatic stimulation in mechanically ventilated patients: a randomised study
Source: Springer Nature journal article supplement (doi:10.1186/s13054-023-04597-1), 2023-08-30

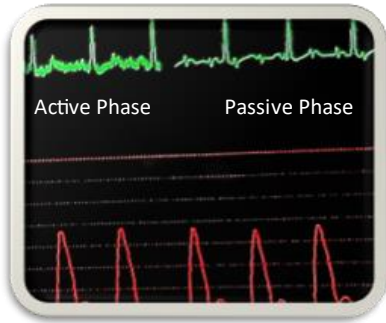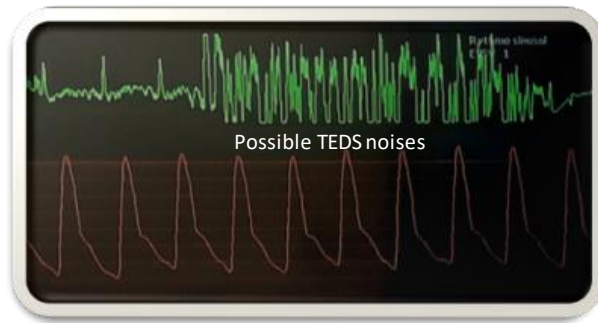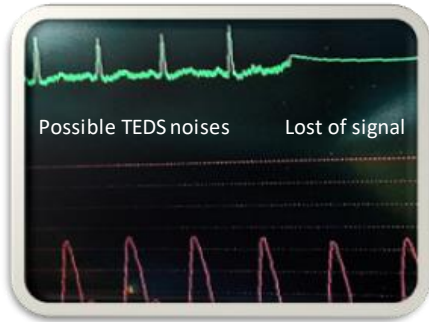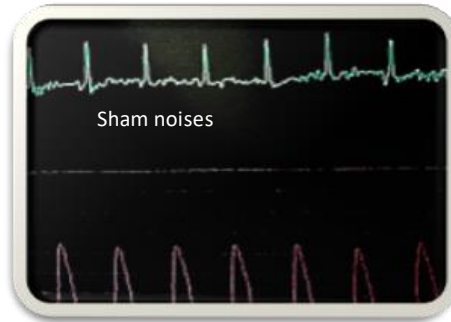

Supplement: MOESM5 [file 25981424]
